# Supplementary material for: Spiropyran as a reusable chemosensor for selective colorimetric detection of aromatic thiols
Source: Royal Society of Chemistry journal article supplement (doi:10.1039/c3cp55478c), 2014-01-01
Supplement: c3cp55478c1.pdf [file c3cp55478c1.pdf]

## Spiropyran as a reusable chemosensor for selective colorimetric detection of aromatic thiols

Yasuhiro Shiraishi,\* Kohei Yamamoto, Shigehiro Sumiya and Takayuki Hirai

*Research Center for Solar Energy Chemistry, and Division of Chemical Engineering,  
Graduate School of Engineering Science, Osaka University, Toyonaka 560-8531, Japan*

*E-mail: shiraish@cheng.es.osaka-u.ac.jp*

### Electronic Supplementary Information (ESI†)

#### CONTENTS

|                                                                                              | page |
|----------------------------------------------------------------------------------------------|------|
| <b>Details for equilibrium and kinetic analysis</b> .....                                    | 2    |
| <b>References</b> .....                                                                      | 3    |
| <b>Table S1</b> Equilibrium and kinetic data for isomerization of <b>1</b> .....             | 4    |
| <b>Table S2</b> Dihedral angles.....                                                         | 5    |
| <b>Fig. S1</b> Effect of other nucleophiles on the response of <b>1</b> with <b>2a</b> ..... | 5    |
| <b>Fig. S2</b> Change in absorption spectra upon 550 nm light irradiation.....               | 6    |
| <b>Fig. S3</b> Equilibrium absorption data.....                                              | 7    |
| <b>Fig. S4</b> van't Hoff plots of the equilibrium data.....                                 | 7    |
| <b>Fig. S5</b> Kinetic absorption data.....                                                  | 8    |
| <b>Fig. S6</b> Arrhenius plots of the kinetic data.....                                      | 8    |
| <b>Fig. S7</b> Effect of water content on the colorimetric response of <b>1</b> .....        | 9    |
| <b>Cartesian coordinates</b> .....                                                           | 10   |

## Details for equilibrium and kinetic analysis

### 1. Equilibrium analysis for compound 1

Thermodynamic equilibrium constant for the SP and MC forms ( $K_{\text{eq}}$ ) is expressed as follows:<sup>[1]</sup>

$$K_{\text{eq}} = \frac{[\text{MC}]_{\text{eq}}}{[\text{SP}]_{\text{eq}}} \quad (1)$$

$$C_{\text{T}} = [\text{SP}]_{\text{eq}} + [\text{MC}]_{\text{eq}} = \frac{A_{\text{MC}}}{\varepsilon_{\text{MC}}} \left( 1 + \frac{1}{K_{\text{eq}}} \right) \quad (2)$$

where  $[\text{SP}]_{\text{eq}}$  and  $[\text{MC}]_{\text{eq}}$  are the equilibrium concentrations of the SP and MC forms,  $C_{\text{T}}$  is the total concentration of SP and MC forms, and  $A_{\text{MC}}$  and  $\varepsilon_{\text{MC}}$  are the absorbance and the molar extinction coefficient of the MC form, respectively.<sup>[2]</sup>  $K_{\text{eq}}$  was determined by equilibrium absorption analysis: the solutions containing different concentrations of **1** ( $C_{\text{T}}$ ) were stirred for 6 h in the dark at different temperature, and the MC absorbance ( $A_{\text{MC}}$ ) was plotted against  $C_{\text{T}}$  (Fig. S3). It must be noted that all of the solutions attain the absorption equilibrium by 6 h stirring. Linear relationship was observed between  $C_{\text{T}}$  and  $A_{\text{MC}}$  for all of the solutions. The  $\varepsilon_{\text{MC}}$  value of **1** in a water/MeCN (7/3 v/v) mixture ( $2.36 \times 10^4 \text{ M}^{-1} \text{ cm}^{-1}$ ) was determined at 298 K according to literature procedure.<sup>[3]</sup> The  $K_{\text{eq}}$  values for respective solutions at different temperatures were therefore determined with  $\varepsilon_{\text{MC}}$  and the slope of Fig. S3. The standard enthalpy ( $\Delta_{\text{r}}H$ ) and entropy ( $\Delta_{\text{r}}S$ ) for isomerization were determined using the van't Hoff equation (eq. 3).<sup>[4]</sup>

$$\ln K = -\frac{\Delta_{\text{r}}H}{RT} + \frac{\Delta_{\text{r}}S}{R} \quad (3)$$

The van't Hoff plots are shown in Fig. S4, and the obtained equilibrium parameters are summarized in Table S1.

### 2. Kinetic analysis for isomerization of 1

Kinetic analysis for SP→MC isomerization of **1** was carried out as follows.<sup>[5]</sup> The apparent rate constant for SP→MC isomerization ( $k_{\text{obsd}}$ ) is expressed by the sum of the forward ( $k_{\text{SP} \rightarrow \text{MC}}$ ) and backward rate constant ( $k_{\text{MC} \rightarrow \text{SP}}$ ).<sup>[6]</sup>

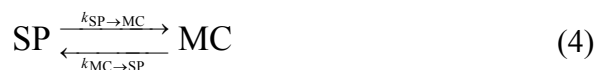

$$k_{\text{obsd}} = k_{\text{SP} \rightarrow \text{MC}} + k_{\text{MC} \rightarrow \text{SP}} \quad (5)$$

The equilibrium constant,  $K_{\text{eq}}$  (eq. 1), is therefore rewritten as follows.

$$K_{\text{eq}} = \frac{k_{\text{SP} \rightarrow \text{MC}}}{k_{\text{MC} \rightarrow \text{SP}}} \quad (6)$$

The forward and backward rate constants are expressed as follows.

$$k_{\text{SP} \rightarrow \text{MC}} = \frac{K_{\text{eq}}}{1 + K_{\text{eq}}} k_{\text{obsd}} \quad (7)$$

$$k_{\text{MC} \rightarrow \text{SP}} = \frac{1}{1 + K_{\text{eq}}} k_{\text{obsd}} \quad (8)$$

The relationship between the MC absorbance and  $k_{\text{obsd}}$  is expressed as follows:<sup>[7]</sup>

$$\ln \left[ \frac{A_{\infty} - A_t}{A_{\infty} - A_0} \right] = -k_{\text{obsd}} t \quad (9)$$

where  $A_0$ ,  $A_t$ , and  $A_{\infty}$  are the absorbance at time 0,  $t$ , and infinity, respectively. Fig. S5 shows the plots of  $\ln[(A_{\infty} - A_t)/(A_{\infty} - A_0)]$  vs. time during SP  $\rightarrow$  MC isomerization of **1** at different temperatures. The rate constants ( $k_{\text{SP} \rightarrow \text{MC}}$  and  $k_{\text{MC} \rightarrow \text{SP}}$ ) determined using the eqs. 7 and 8 are summarized in Table S1. The activation energy ( $E_a$ ) for isomerization is determined by the Arrhenius plots (Fig. S6),<sup>[8]</sup> using the following equation.

$$\ln k_{\text{SP} \rightarrow \text{MC}} = \ln A - \frac{E_a}{RT} \quad (10)$$

where  $A$  is frequency factor. The activation enthalpy ( $\Delta H^{\ddagger}$ ) and entropy ( $\Delta S^{\ddagger}$ ) for isomerization are expressed as follows:<sup>[9]</sup>

$$\Delta H^{\ddagger} = E_a - RT \quad (11)$$

$$\Delta S^{\ddagger} = R \left[ \ln A - 1 - \ln \frac{k_{\text{B}} T}{h} \right] \quad (12)$$

where  $k_{\text{B}}$  and  $h$  are the Boltzmann's constant and the Plank's constant, respectively.<sup>[8]</sup> The obtained  $\Delta H^{\ddagger}$  and  $\Delta S^{\ddagger}$  values are summarized in Table S1.

## References

- [1] Y. Shiraishi, M. Itoh and T. Hirai, *Phys. Chem. Chem. Phys.*, 2010, **12**, 13737–13745.
- [2] J. B. Flannery, Jr., *J. Am. Chem. Soc.*, 1968, **90**, 5660–5671.
- [3] C. A. Heller, D. A. Fine and R. A. Henry, *J. Phys. Chem.*, 1961, **65**, 1908–1909.
- [4] S.-H. Kim, H.-J. Suh, J.-Z. Cui, Y.-S. Gal, S.-H. Jin and K. Koh, *Dyes Pigm.*, 2002, **53**, 251–256.
- [5] Y. Shiraishi, T. Inoue, S. Sumiya and T. Hirai, *J. Phys. Chem. A*, 2011, **115**, 9083–9090.
- [6] K. Takagi, T. Kurematsu and Y. Sawaki, *J. Chem. Soc., Perkin Trans. 2*, 1995, 1667–1671.
- [7] J. Zhou, F. Zhao, Y. Li, F. Zhang and X. Song, *J. Photochem. Photobiol. A*, 1995, **92**, 193–199.
- [8] S. Zhang, Q. Zhang, B. Ye, X. Li, X. Zhang and Y. Deng, *J. Phys. Chem. B*, 2009, **113**, 6012–6019.
- [9] N. Y. C. Chu, *Can. J. Chem.*, 1983, **61**, 300–305.

**Table S1.** Equilibrium and kinetic data for isomerization of **1** in a water/MeCN mixture (7/3 v/v; HEPES 0.1 M, pH 7.0) determined with different amount of **2a**.

| <b>2a</b><br>/ equiv | $T / ^\circ\text{C}$ | $K_{\text{eq}}$ | $\Delta_r H$<br>/ $\text{kJ mol}^{-1}$ | $\Delta_r S$<br>/ $\text{J K}^{-1} \text{mol}^{-1}$ | $k_{\text{obsd}}$<br>/ $10^{-4} \text{s}^{-1}$ | $k_{\text{SP} \rightarrow \text{MC}}$<br>/ $10^{-4} \text{s}^{-1}$ | $k_{\text{MC} \rightarrow \text{SP}}$<br>/ $10^{-4} \text{s}^{-1}$ | $\Delta H^\ddagger$<br>/ $\text{kJ mol}^{-1}$ | $\Delta S^\ddagger$<br>/ $\text{J K}^{-1} \text{mol}^{-1}$ |
|----------------------|----------------------|-----------------|----------------------------------------|-----------------------------------------------------|------------------------------------------------|--------------------------------------------------------------------|--------------------------------------------------------------------|-----------------------------------------------|------------------------------------------------------------|
| 0                    | 25                   | 2.95            | $-6.61 \pm 0.34$                       | $-13.2 \pm 1.0$                                     | 0.69                                           | 0.52                                                               | 0.17                                                               | $107.7 \pm 2.9$                               | $32.5 \pm 9.1$                                             |
|                      | 40                   | 2.58            |                                        |                                                     | 4.77                                           | 3.44                                                               | 1.33                                                               |                                               |                                                            |
|                      | 50                   | 2.38            |                                        |                                                     | 17.6                                           | 12.4                                                               | 5.21                                                               |                                               |                                                            |
|                      | 60                   | 2.22            |                                        |                                                     | 63.5                                           | 43.8                                                               | 19.7                                                               |                                               |                                                            |
| 1                    | 15                   | 3.39            | $-6.61 \pm 0.79$                       | $-12.8 \pm 2.6$                                     | 0.22                                           | 0.17                                                               | 0.05                                                               | $87.0 \pm 3.6$                                | $-33.6 \pm 12.1$                                           |
|                      | 25                   | 3.12            |                                        |                                                     | 0.82                                           | 0.62                                                               | 0.20                                                               |                                               |                                                            |
|                      | 35                   | 2.84            |                                        |                                                     | 2.60                                           | 1.92                                                               | 0.68                                                               |                                               |                                                            |
| 2                    | 15                   | 3.38            | $-6.74 \pm 0.54$                       | $-13.2 \pm 1.8$                                     | 0.32                                           | 0.25                                                               | 0.07                                                               | $74.8 \pm 1.3$                                | $-73.31 \pm 4.6$                                           |
|                      | 25                   | 3.09            |                                        |                                                     | 0.95                                           | 0.72                                                               | 0.23                                                               |                                               |                                                            |
|                      | 35                   | 2.81            |                                        |                                                     | 2.72                                           | 2.01                                                               | 0.71                                                               |                                               |                                                            |
| 10                   | 15                   | 3.39            | $-6.73 \pm 0.30$                       | $-13.2 \pm 1.0$                                     | 2.70                                           | 2.08                                                               | 0.62                                                               | $45.6 \pm 3.5$                                | $-157.0 \pm 11.9$                                          |
|                      | 25                   | 3.07            |                                        |                                                     | 5.20                                           | 3.92                                                               | 1.28                                                               |                                               |                                                            |
|                      | 35                   | 2.82            |                                        |                                                     | 10.4                                           | 7.68                                                               | 2.72                                                               |                                               |                                                            |
| 30                   | 15                   | 3.36            | $-6.68 \pm 0.40$                       | $-13.1 \pm 1.3$                                     | 4.73                                           | 3.65                                                               | 1.08                                                               | $44.0 \pm 4.7$                                | $-157.6 \pm 15.7$                                          |
|                      | 25                   | 3.05            |                                        |                                                     | 9.80                                           | 7.38                                                               | 2.42                                                               |                                               |                                                            |
|                      | 35                   | 2.81            |                                        |                                                     | 17.4                                           | 12.8                                                               | 4.57                                                               |                                               |                                                            |

**Table S2.** The dihedral angles ( $^{\circ}$ ) of the N-C<sub>1</sub>-C<sub>2</sub>-C<sub>3</sub>, C<sub>1</sub>-C<sub>2</sub>-C<sub>3</sub>-C<sub>4</sub>, and C<sub>2</sub>-C<sub>3</sub>-C<sub>4</sub>-C<sub>5</sub> moieties of **1** determined by DFT calculation in the absence and presence of **2a**.

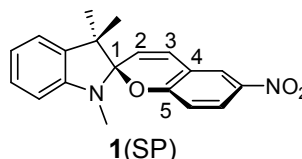

|                 | N-C <sub>1</sub> -C <sub>2</sub> -C <sub>3</sub> | C <sub>1</sub> -C <sub>2</sub> -C <sub>3</sub> -C <sub>4</sub> | C <sub>2</sub> -C <sub>3</sub> -C <sub>4</sub> -C <sub>5</sub> |
|-----------------|--------------------------------------------------|----------------------------------------------------------------|----------------------------------------------------------------|
| <b>1(SP)</b>    | 116.6                                            | 2.4                                                            | -0.7                                                           |
| <b>TS1</b>      | 81.8                                             | 6.3                                                            | 10.9                                                           |
| <b>CCC</b>      | 43.5                                             | 15.3                                                           | 16.6                                                           |
| <b>TS2</b>      | -2.6                                             | 96.4                                                           | -2.8                                                           |
| <b>CTC</b>      | 17.9                                             | 178.3                                                          | 2.6                                                            |
| <b>TS3</b>      | 94.2                                             | 178.6                                                          | -0.5                                                           |
| <b>TTC (MC)</b> | 179.9                                            | 180.0                                                          | 0                                                              |
| <b>TS4</b>      | -4.9                                             | 63.3                                                           | 8.2                                                            |
| <b>CCC-2a</b>   | 6.9                                              | 47.1                                                           | 68.8                                                           |
| <b>TS5</b>      | -14.1                                            | 157.5                                                          | 117.8                                                          |
| <b>CTT-2a</b>   | 3.3                                              | -122.5                                                         | 112.0                                                          |
| <b>TS6</b>      | -3.4                                             | -159.8                                                         | 155.1                                                          |

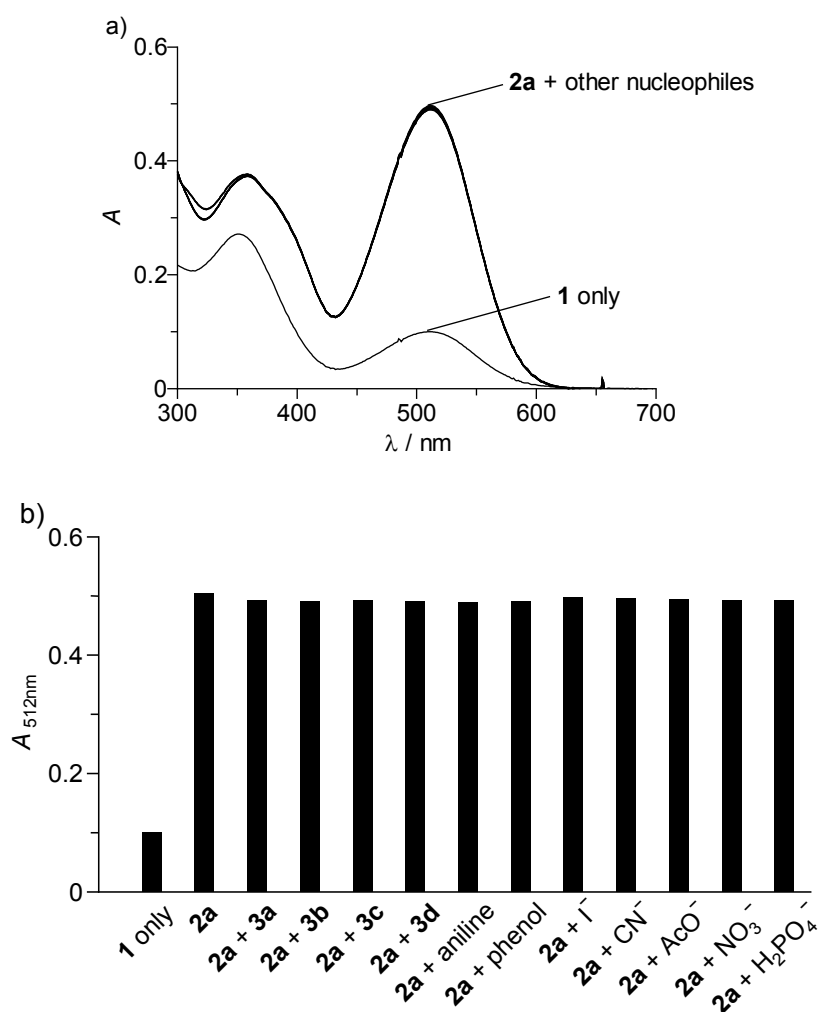

**Fig. S1** (a) Absorption spectra of **1** (30  $\mu$ M) measured in a water/MeCN mixture (7/3 v/v; HEPES 0.1 M, pH 7.0) with **2a** (30 equiv) together with each respective nucleophile (30 equiv) for 60 min at 25  $^{\circ}$ C in the dark. (b) Absorbance of solutions at 512 nm.

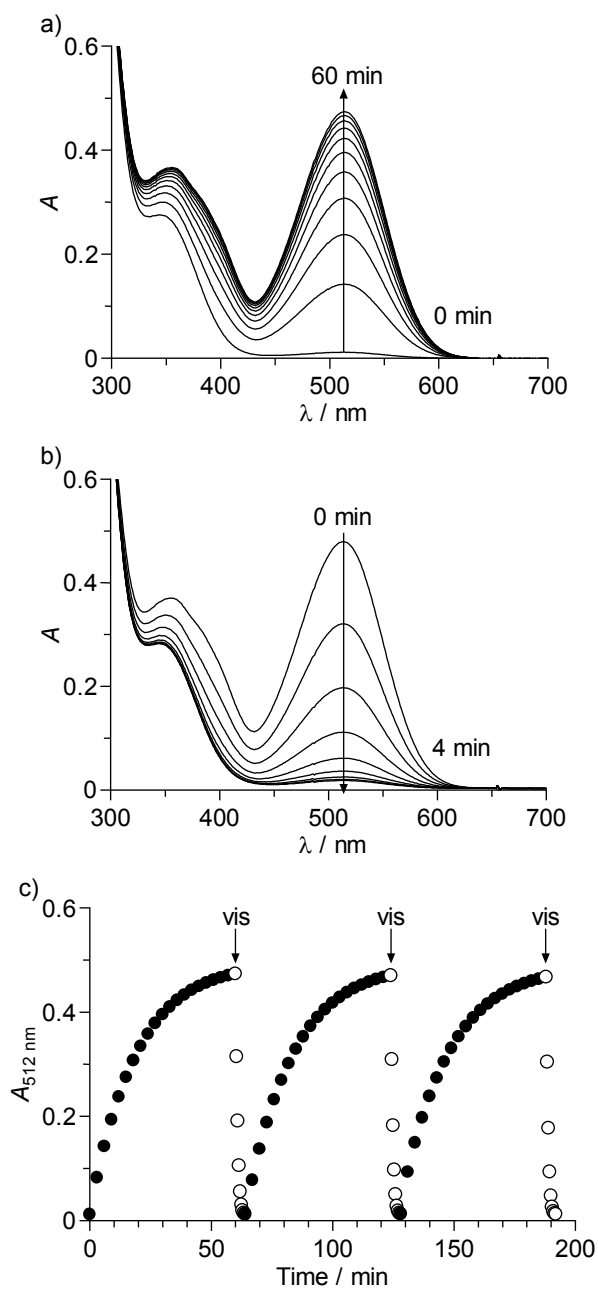

**Fig. S2** (a) Time-dependent change in the absorption spectra of **1** (30  $\mu\text{M}$ ) measured in the presence of 30 equiv of **2a** in a buffered water/MeCN mixture (7/3 v/v; HEPES 0.1 M, pH 7.0) at 25  $^{\circ}\text{C}$  in the dark. (b) Change in absorption spectra of the solution (a) when irradiated with 550 nm monochromatic light. (c) Change in 512 nm absorbance during the repeated stirring under the dark and 550 nm irradiation conditions.

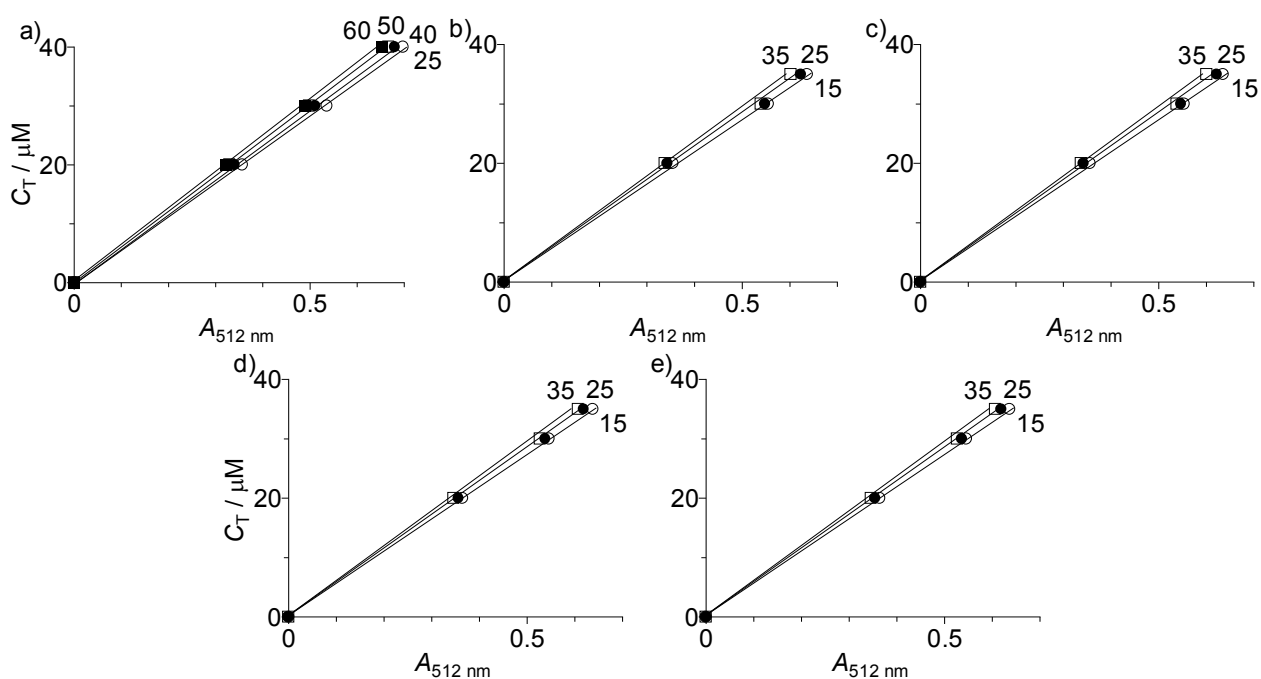

**Fig. S3** Plots of  $C_T$  vs.  $A_{MC}$  obtained by the equilibrium absorption experiments for **1** (6 h) at different temperatures (15–60 °C) in a buffered water/MeCN mixture (7/3 v/v; HEPES 0.1M, pH 7.0), (a) in the absence of **2a** and in the presence of (b) 1 equiv, (c) 2 equiv, (d) 10 equiv, and (e) 30 equiv of **2a**.

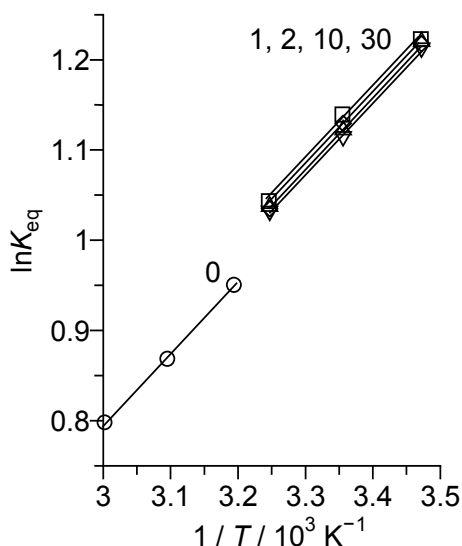

**Fig. S4** van't Hoff plots of the  $K_{eq}$  data for **1** obtained by equilibrium absorption experiments with different amount of **2a** in a buffered water/MeCN mixture (7/3 v/v; HEPES 0.1M, pH 7.0) at different temperatures. The numbers in the figure denote the amount of **2a** added relative to that of **1** (equiv).

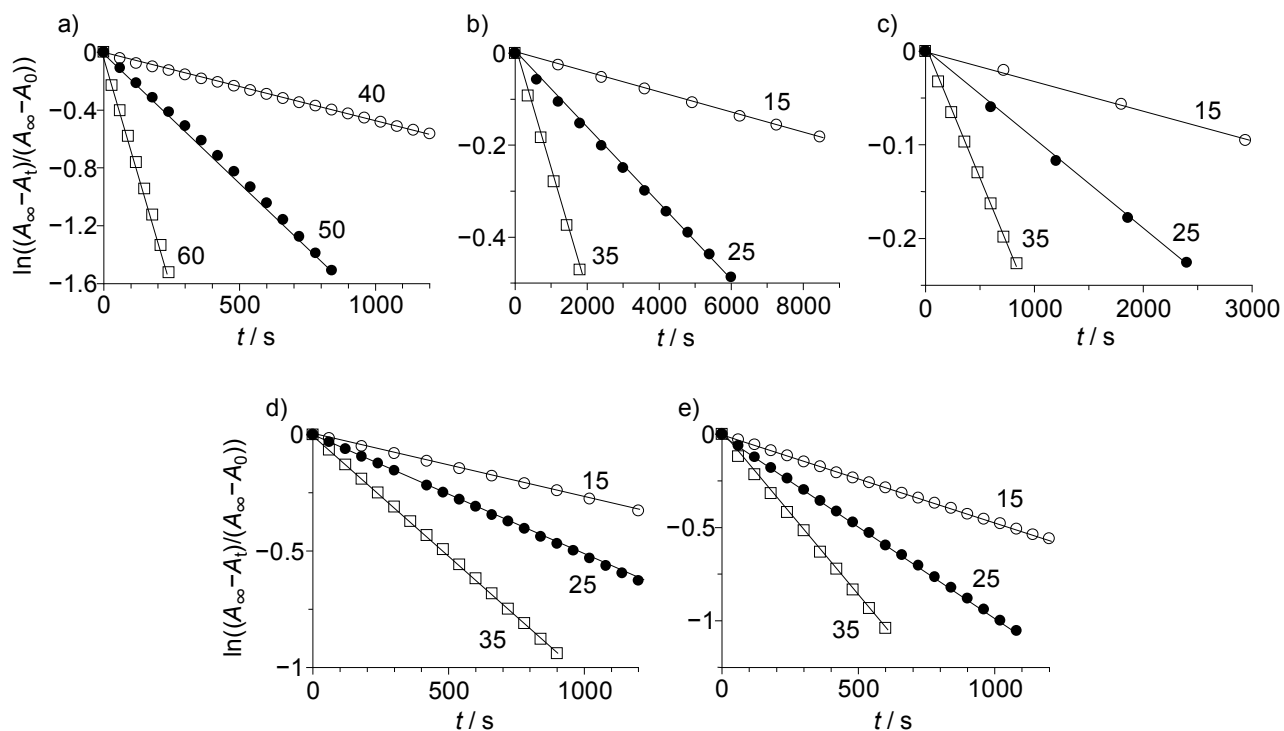

**Fig. S5** Kinetic absorption data for the SP→MC isomerization of **1** in a buffered water/MeCN mixture (7/3 v/v; HEPES 0.1M, pH 7.0) in the (a) absence of **2a** and presence of (b) 1 equiv, (c) 2 equiv, (d) 10 equiv, and (e) 30 equiv of **2a** at different temperatures. The numbers in the figure denote the temperature.

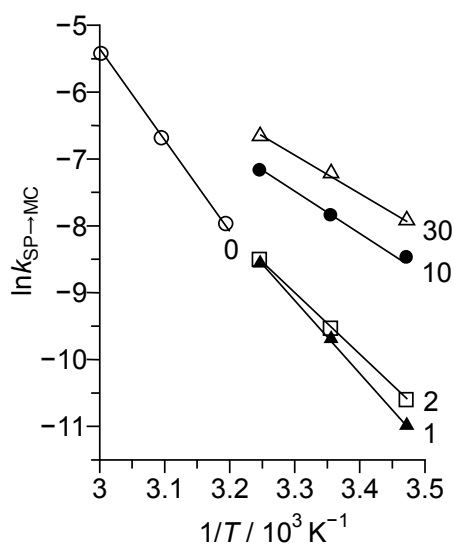

**Fig. S6** Arrhenius plots of the kinetic absorption data for **1** in a buffered water/MeCN mixture (7/3 v/v; HEPES 0.1M, pH 7.0) at different temperatures obtained with different amount of **2a**. The numbers in the figure denote the amount of **2a** relative to that of **1** (equiv).



**a** (MeCN)

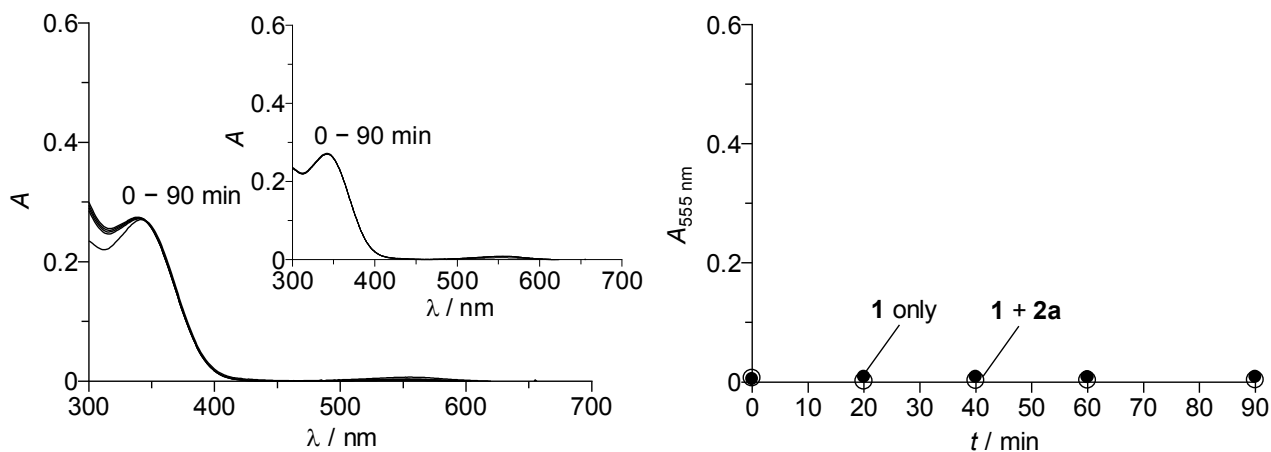

**b** (water/MeCN = 3/7 v/v)

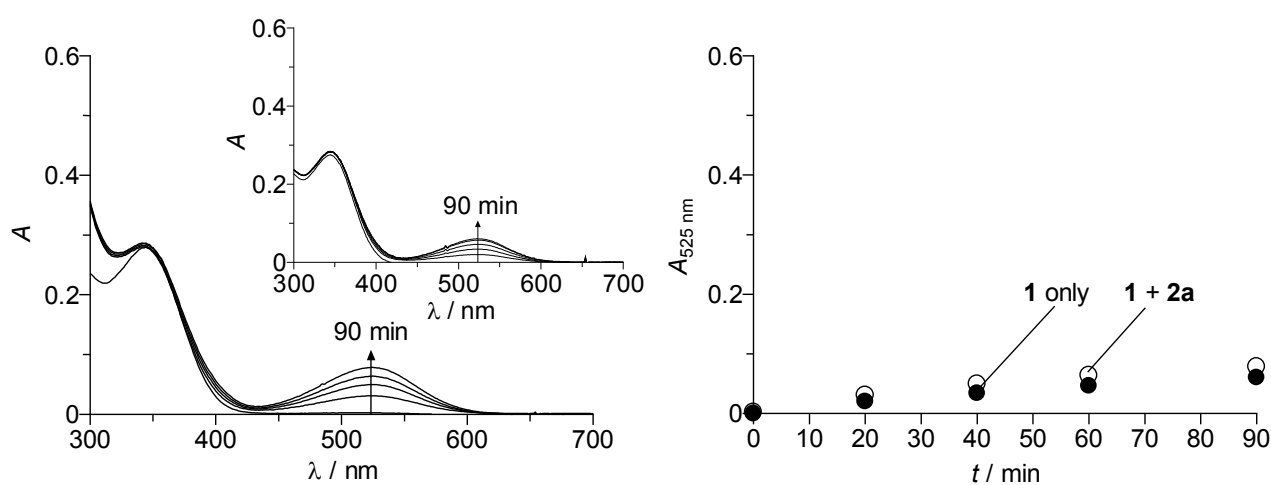

**c** (water/MeCN = 5/5 v/v)

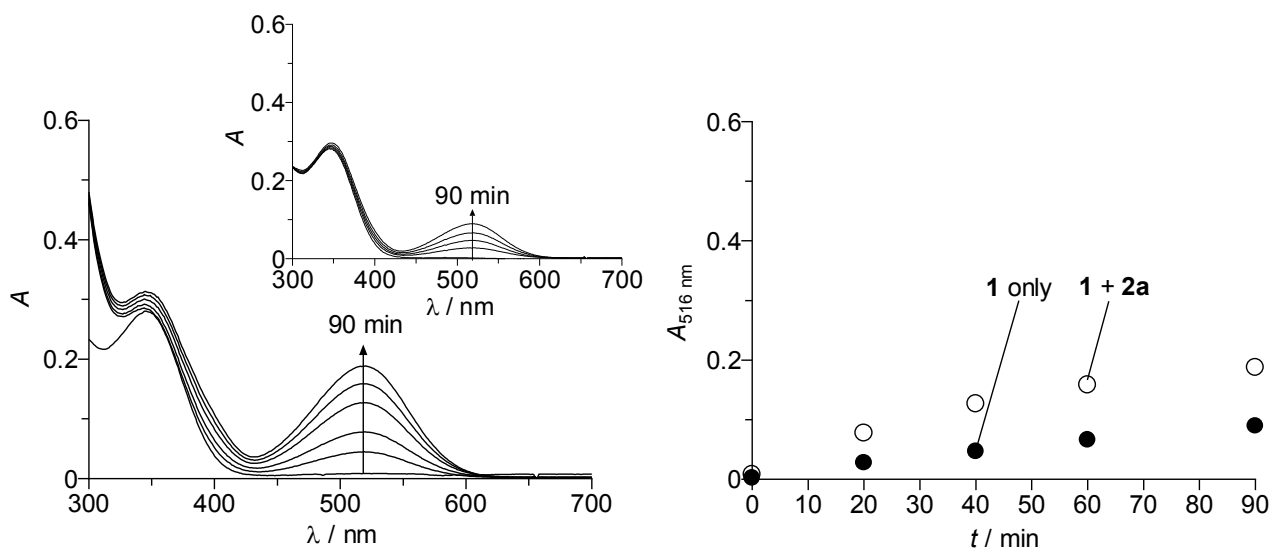

**Fig. S7** (Left) Effect of water content on the time-dependent change in the absorption spectra of **1** (30 μM) in the absence (inset) and presence of 30 equiv of benzenethiol (**2a**) in the dark at 25 °C. (Right) Change in MC absorbance.

### Cartesian Coordinates (in Å) of 1(SP)

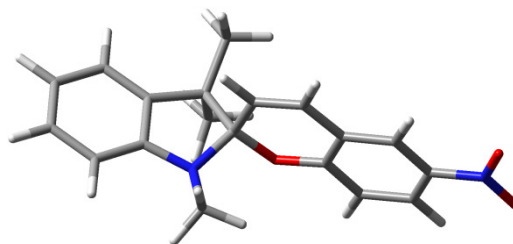

|   |           |           |           |   |           |           |           |
|---|-----------|-----------|-----------|---|-----------|-----------|-----------|
| C | 0.00124   | -0.01494  | -0.013306 | N | 10.879425 | 1.823404  | 1.960002  |
| C | -0.006895 | -0.014158 | 1.382163  | O | 11.005083 | 3.051214  | 2.039333  |
| C | 1.187243  | -0.005697 | 2.118207  | O | 11.825343 | 1.036139  | 2.082577  |
| C | 2.391917  | -0.008195 | 1.413454  | H | -0.93495  | -0.011835 | -0.564025 |
| C | 2.410752  | -0.000293 | 0.006701  | H | -0.953969 | -0.01045  | 1.915673  |
| C | 1.223353  | -0.012061 | -0.708069 | H | 1.165808  | 0.007251  | 3.20333   |
| N | 3.69444   | -0.019901 | 1.920168  | H | 1.232545  | -0.010055 | -1.795389 |
| C | 4.605318  | 0.416514  | 0.849094  | H | 6.124008  | 3.548424  | 1.233819  |
| C | 3.855807  | -0.058685 | -0.467637 | H | 3.934447  | 2.510765  | 0.802241  |
| O | 5.8382    | -0.328731 | 0.993413  | H | 10.249495 | -0.760274 | 1.739378  |
| C | 7.038961  | 0.242644  | 1.230685  | H | 8.635339  | 3.22248   | 1.639357  |
| C | 7.204275  | 1.642837  | 1.321029  | H | 5.034176  | 0.203268  | 3.503037  |
| C | 6.019323  | 2.469567  | 1.156375  | H | 3.422707  | -0.349419 | 3.962788  |
| C | 4.828815  | 1.905361  | 0.915626  | H | 3.682102  | 1.364888  | 3.555723  |
| C | 8.12917   | -0.625186 | 1.383114  | H | 5.237374  | 0.812894  | -1.909531 |
| C | 9.393591  | -0.108162 | 1.621707  | H | 3.850335  | 1.858608  | -1.544121 |
| C | 9.556545  | 1.27935   | 1.71047   | H | 3.641772  | 0.430978  | -2.567456 |
| C | 8.478083  | 2.153166  | 1.564087  | H | 5.258565  | -1.616778 | -1.115461 |
| C | 3.968093  | 0.332929  | 3.304098  | H | 3.573268  | -1.877355 | -1.609333 |
| C | 4.164193  | 0.820787  | -1.687053 | H | 4.06379   | -2.180624 | 0.068748  |
| C | 4.216272  | -1.527105 | -0.795056 | H | 7.966486  | -1.694832 | 1.308943  |

### Cartesian Coordinates (in Å) of CCC

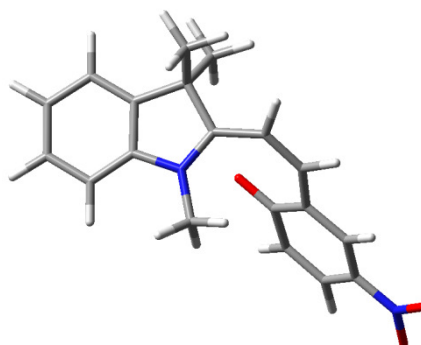

|   |           |           |           |   |           |           |           |
|---|-----------|-----------|-----------|---|-----------|-----------|-----------|
| C | -0.006163 | -0.006033 | -0.008096 | H | 1.227942  | 3.915186  | 5.489147  |
| C | -0.005353 | 0.004003  | 1.395197  | H | 1.861822  | 4.040447  | 7.890532  |
| C | 1.279559  | 0.005681  | 2.117821  | H | 1.137341  | 2.289204  | 9.480661  |
| C | 2.475353  | 0.048292  | 1.289189  | H | -0.244495 | 0.371119  | 8.710979  |
| C | 2.432358  | 0.087053  | -0.074639 | H | -2.63145  | -0.436245 | 3.610282  |
| C | 1.174994  | 0.055538  | -0.737794 | H | -2.067221 | -0.500111 | 1.394749  |
| C | -1.278683 | -0.129984 | 2.050095  | H | 3.425418  | 0.057786  | 1.815607  |
| C | -1.672663 | 0.012841  | 3.357709  | H | 3.338429  | 0.131137  | -0.667586 |

|   |           |           |           |   |           |           |           |
|---|-----------|-----------|-----------|---|-----------|-----------|-----------|
| C | -1.023383 | 0.614555  | 4.476037  | H | -0.947145 | -0.047826 | -0.546084 |
| N | -0.369432 | 1.770842  | 4.489564  | C | -0.499577 | -1.370336 | 5.941604  |
| C | 0.132233  | 2.064077  | 5.786542  | H | -0.486746 | -1.730285 | 6.975372  |
| C | -0.284393 | 1.062299  | 6.665256  | H | -1.102562 | -2.060277 | 5.342698  |
| C | -1.107855 | 0.05018   | 5.89516   | H | 0.519615  | -1.369865 | 5.54831   |
| C | 0.069135  | 1.135868  | 8.006094  | C | -2.576324 | 0.026052  | 6.391514  |
| C | 0.847162  | 2.219639  | 8.436637  | H | -3.175933 | -0.677657 | 5.805932  |
| C | 1.256886  | 3.210543  | 7.538217  | H | -2.596993 | -0.30089  | 7.435577  |
| C | 0.90269   | 3.15015   | 6.185485  | H | -3.036761 | 1.016906  | 6.332144  |
| O | 1.362911  | -0.044753 | 3.369208  | C | -0.197837 | 2.687856  | 3.36927   |
| N | 1.124688  | 0.071379  | -2.165618 | H | -0.942544 | 2.4608    | 2.60834   |
| O | 0.017497  | 0.035855  | -2.734836 | H | -0.342192 | 3.707925  | 3.73034   |
| O | 2.195535  | 0.120428  | -2.799779 | H | 0.803566  | 2.583715  | 2.94612   |

### Cartesian Coordinates (in Å) of CTC

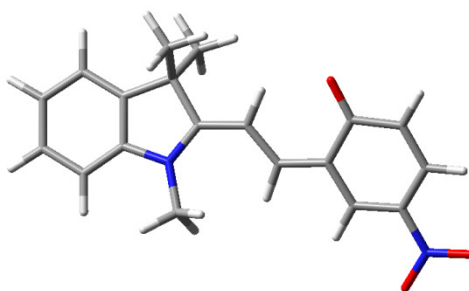

|   |           |           |           |   |           |           |           |
|---|-----------|-----------|-----------|---|-----------|-----------|-----------|
| C | 0.004344  | -0.017369 | 0.001257  | H | -6.820437 | -0.510179 | 3.573178  |
| C | 0.000899  | 0.009414  | 1.409653  | H | -8.203187 | 0.026176  | 5.559483  |
| C | 1.28873   | 0.033371  | 2.139509  | H | -7.159182 | 0.860986  | 7.642947  |
| C | 2.487696  | 0.033803  | 1.310021  | H | -4.696756 | 1.177545  | 7.782647  |
| C | 2.445645  | 0.005551  | -0.051911 | H | -0.642225 | 0.204177  | 4.050352  |
| C | 1.186328  | -0.021374 | -0.720083 | H | -2.111491 | 0.00162   | 1.369813  |
| C | -1.268809 | 0.012496  | 2.054588  | H | 3.436813  | 0.054447  | 1.837571  |
| C | -1.51218  | 0.088038  | 3.415597  | H | 3.352487  | 0.003147  | -0.645233 |
| C | -2.756356 | 0.125299  | 4.074759  | H | -0.936696 | -0.036957 | -0.538098 |
| N | -3.972709 | -0.219769 | 3.617661  | C | -2.101213 | -0.363688 | 6.471056  |
| C | -4.976795 | 0.024698  | 4.594729  | H | -2.258377 | -0.055573 | 7.509541  |
| C | -4.370059 | 0.50493   | 5.757395  | H | -1.02707  | -0.330837 | 6.264994  |
| C | -2.875598 | 0.593085  | 5.530235  | H | -2.4474   | -1.395957 | 6.36182   |
| C | -5.148391 | 0.806436  | 6.866985  | C | -2.353426 | 2.040627  | 5.684367  |
| C | -6.536067 | 0.626529  | 6.785226  | H | -1.283689 | 2.093435  | 5.460307  |
| C | -7.126039 | 0.153408  | 5.609002  | H | -2.505245 | 2.376075  | 6.715115  |
| C | -6.351856 | -0.156498 | 4.484801  | H | -2.883632 | 2.726852  | 5.017025  |
| O | 1.373031  | 0.051349  | 3.388037  | C | -4.280236 | -0.852855 | 2.33807   |
| N | 1.143246  | -0.052812 | -2.150462 | H | -3.459603 | -1.514322 | 2.05688   |
| O | 0.038747  | -0.078972 | -2.722794 | H | -4.439507 | -0.104726 | 1.555951  |
| O | 2.218294  | -0.053041 | -2.777183 | H | -5.185253 | -1.449294 | 2.452187  |

### Cartesian Coordinates (in Å) of TTC

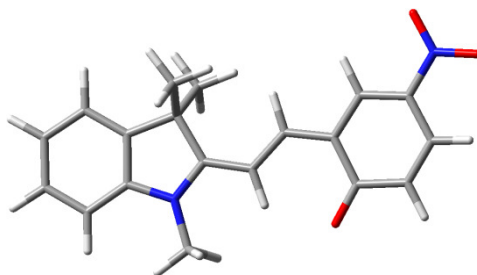

|   |           |           |           |   |           |           |           |
|---|-----------|-----------|-----------|---|-----------|-----------|-----------|
| C | 0.005968  | 0.001688  | -0.015669 | C | 4.144167  | 1.276227  | -1.306686 |
| C | -0.002224 | 0.003561  | 1.382743  | C | 4.142568  | -1.283018 | -1.302484 |
| C | 1.190541  | 0.003541  | 2.114118  | C | 4.07468   | 0.001857  | 3.283383  |
| C | 2.379286  | 0.001511  | 1.390001  | H | -0.933536 | 0.001774  | -0.559901 |
| C | 2.406569  | -0.000207 | -0.006571 | H | -0.947888 | 0.005139  | 1.916325  |
| C | 1.216514  | -0.000189 | -0.721664 | H | 1.168884  | 0.005221  | 3.198101  |
| N | 3.713693  | 0.000867  | 1.866166  | H | 1.217288  | -0.001501 | -1.808018 |
| C | 4.604932  | -0.000268 | 0.855439  | H | 6.324453  | 0.002954  | 2.1381    |
| C | 3.848995  | -0.001852 | -0.48227  | H | 6.671346  | -0.00432  | -0.90623  |
| C | 5.988218  | 0.000389  | 1.109602  | H | 10.946311 | 0.005282  | 2.66511   |
| C | 6.973665  | -0.001711 | 0.137096  | H | 12.305144 | 0.000499  | 0.585451  |
| C | 8.381586  | -0.000876 | 0.337104  | H | 8.736491  | -0.006093 | -1.796663 |
| C | 9.015129  | 0.002661  | 1.675792  | H | 5.181293  | 1.306947  | -1.649554 |
| C | 10.473198 | 0.002837  | 1.687504  | H | 3.948172  | 2.177361  | -0.717768 |
| C | 11.222056 | 0.000205  | 0.54902   | H | 3.495334  | 1.295536  | -2.187938 |
| C | 10.576411 | -0.003015 | -0.722695 | H | 5.17964   | -1.316128 | -1.645303 |
| C | 9.195304  | -0.003534 | -0.813625 | H | 3.493635  | -1.304437 | -2.183605 |
| O | 8.365342  | 0.004888  | 2.744982  | H | 3.945492  | -2.181957 | -0.710584 |
| N | 11.364971 | -0.005818 | -1.917831 | H | 4.664775  | -0.887152 | 3.520331  |
| O | 12.604569 | -0.005442 | -1.811107 | H | 3.16831   | -0.004512 | 3.884308  |
| O | 10.791181 | -0.008503 | -3.021631 | H | 4.654046  | 0.897466  | 3.522281  |

### Cartesian Coordinates (in Å) of TS1

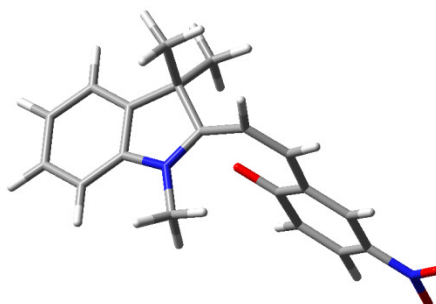

|   |           |           |           |   |           |           |           |
|---|-----------|-----------|-----------|---|-----------|-----------|-----------|
| C | 0.008223  | -0.170587 | -0.011222 | H | 0.975724  | 4.13406   | 5.7518    |
| C | -0.009612 | -0.060458 | 1.377169  | H | 2.131437  | 4.004136  | 7.951355  |
| C | 1.238276  | 0.036692  | 2.110607  | H | 2.198504  | 1.880107  | 9.218579  |
| C | 2.455331  | 0.012701  | 1.343197  | H | 1.096986  | -0.162905 | 8.325179  |
| C | 2.446504  | -0.074521 | -0.026766 | H | -2.527265 | -0.114431 | 3.762581  |
| C | 1.215389  | -0.166501 | -0.715474 | H | -2.126242 | -0.431833 | 1.480633  |
| C | -1.273307 | -0.124732 | 2.083641  | H | 3.39099   | 0.077879  | 1.890225  |
| C | -1.523182 | 0.089378  | 3.394227  | H | 3.369836  | -0.078786 | -0.593916 |

|   |           |           |           |   |           |           |           |
|---|-----------|-----------|-----------|---|-----------|-----------|-----------|
| C | -0.604031 | 0.566059  | 4.432617  | H | -0.921639 | -0.256757 | -0.562686 |
| N | -0.314722 | 1.854197  | 4.619335  | C | 0.323467  | -1.552878 | 5.578372  |
| C | 0.398614  | 2.043679  | 5.83377   | H | 0.41536   | -2.039566 | 6.554912  |
| C | 0.421448  | 0.834629  | 6.533723  | H | -0.271864 | -2.203406 | 4.929393  |
| C | -0.370506 | -0.193008 | 5.748931  | H | 1.312753  | -1.43456  | 5.137182  |
| C | 1.066226  | 0.765038  | 7.761201  | C | -1.757809 | -0.402338 | 6.428286  |
| C | 1.684301  | 1.9199    | 8.262951  | H | -2.365766 | -1.111873 | 5.858696  |
| C | 1.646492  | 3.12049   | 7.547482  | H | -1.600879 | -0.814341 | 7.429197  |
| C | 0.996455  | 3.203943  | 6.30941   | H | -2.308877 | 0.538076  | 6.527482  |
| O | 1.270801  | 0.128091  | 3.38313   | C | -0.490105 | 2.922333  | 3.642809  |
| N | 1.204657  | -0.268671 | -2.140747 | H | -1.212586 | 2.603162  | 2.893353  |
| O | 0.112378  | -0.358467 | -2.732019 | H | -0.858957 | 3.816215  | 4.150384  |
| O | 2.290487  | -0.264898 | -2.750384 | H | 0.466871  | 3.143874  | 3.160415  |

### Cartesian Coordinates (in Å) of TS2

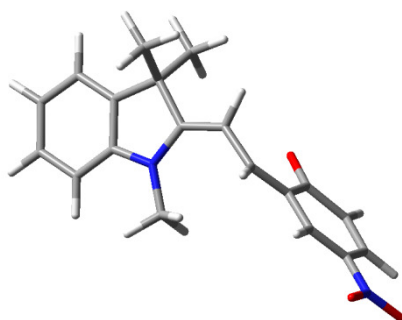

|   |           |           |           |   |           |           |           |
|---|-----------|-----------|-----------|---|-----------|-----------|-----------|
| C | -0.00163  | 0.002511  | -0.000708 | H | -1.831708 | 5.032795  | 4.890235  |
| C | 0.009213  | -0.00764  | 1.443828  | H | -2.28945  | 5.802276  | 7.197503  |
| C | 1.335152  | -0.016438 | 2.156454  | H | -2.670852 | 4.176318  | 9.031154  |
| C | 2.526637  | 0.005678  | 1.297119  | H | -2.596358 | 1.728689  | 8.563522  |
| C | 2.449514  | 0.023931  | -0.053506 | H | -1.547204 | -1.115876 | 3.893955  |
| C | 1.160651  | 0.01955   | -0.703025 | H | -2.070283 | -0.05548  | 1.419591  |
| C | -1.201778 | -0.01665  | 2.084657  | H | 3.485061  | 0.00567   | 1.806047  |
| C | -1.485121 | -0.090899 | 3.52518   | H | 3.338454  | 0.039875  | -0.672337 |
| C | -1.74489  | 0.881166  | 4.422476  | H | -0.950493 | 0.000487  | -0.525425 |
| N | -1.767482 | 2.262904  | 4.226003  | C | -0.964172 | -0.210822 | 6.5943    |
| C | -1.980885 | 2.93406   | 5.43529   | H | -1.193652 | -0.342183 | 7.657692  |
| C | -2.183896 | 2.005791  | 6.468258  | H | -0.865805 | -1.205045 | 6.145006  |
| C | -2.082254 | 0.596949  | 5.90353   | H | 0.00089   | 0.298805  | 6.511515  |
| C | -2.435831 | 2.443037  | 7.759404  | C | -3.429224 | -0.150563 | 6.022297  |
| C | -2.477293 | 3.822474  | 8.022719  | H | -3.365125 | -1.14002  | 5.555788  |
| C | -2.263929 | 4.735955  | 6.988759  | H | -3.696938 | -0.286778 | 7.076252  |
| C | -2.008599 | 4.30805   | 5.678215  | H | -4.234656 | 0.407544  | 5.533768  |
| O | 1.438763  | -0.049888 | 3.384088  | C | -1.502833 | 2.945538  | 2.974676  |
| N | 1.111131  | 0.033086  | -2.158436 | H | -1.910812 | 2.371212  | 2.140813  |
| O | 0.00876   | 0.02773   | -2.714628 | H | -2.003416 | 3.916456  | 2.979534  |
| O | 2.185125  | 0.04939   | -2.769312 | H | -0.429516 | 3.101734  | 2.804517  |

### Cartesian Coordinates (in Å) of TS3

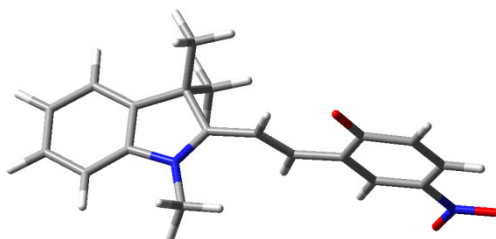

|   |           |           |           |   |           |           |           |
|---|-----------|-----------|-----------|---|-----------|-----------|-----------|
| C | 0.081836  | 0.371658  | 0.044344  | H | -6.250103 | -1.735377 | 4.950962  |
| C | 0.01588   | 0.080077  | 1.403059  | H | -7.94089  | -0.405445 | 6.207425  |
| C | 1.206537  | -0.422156 | 2.104614  | H | -7.499068 | 1.952459  | 6.802763  |
| C | 2.399259  | -0.579434 | 1.291058  | H | -5.363916 | 3.049477  | 6.166844  |
| C | 2.432457  | -0.283258 | -0.044508 | H | -0.7158   | -0.315827 | 4.02662   |
| C | 1.263927  | 0.199722  | -0.686667 | H | -2.054822 | 0.663679  | 1.446681  |
| C | -1.251691 | 0.288112  | 2.081278  | H | 3.285534  | -0.950425 | 1.798772  |
| C | -1.516749 | 0.055564  | 3.387728  | H | 3.337639  | -0.409806 | -0.627361 |
| C | -2.80972  | 0.31518   | 4.014893  | H | -0.796791 | 0.742397  | -0.473461 |
| N | -3.756631 | -0.582627 | 4.15951   | C | -2.222289 | 1.978239  | 5.800091  |
| C | -4.876272 | -0.055404 | 4.876721  | H | -2.551709 | 2.895425  | 6.296872  |
| C | -4.598797 | 1.272749  | 5.202157  | H | -1.225721 | 2.146756  | 5.381856  |
| C | -3.22522  | 1.625637  | 4.67176   | H | -2.163454 | 1.181522  | 6.547408  |
| C | -5.545364 | 2.012675  | 5.900291  | C | -3.268202 | 2.760798  | 3.619158  |
| C | -6.748653 | 1.389452  | 6.256264  | H | -2.275466 | 2.921531  | 3.190039  |
| C | -7.000726 | 0.054214  | 5.919704  | H | -3.589349 | 3.685487  | 4.107682  |
| C | -6.058062 | -0.701259 | 5.214546  | H | -3.971812 | 2.534814  | 2.812368  |
| O | 1.213956  | -0.704448 | 3.332432  | C | -3.722639 | -1.966085 | 3.677271  |
| N | 1.29036   | 0.509569  | -2.071678 | H | -2.784694 | -2.130339 | 3.151278  |
| O | 0.2528    | 0.934956  | -2.623157 | H | -4.565948 | -2.125051 | 3.001759  |
| O | 2.35381   | 0.348972  | -2.707788 | H | -3.80372  | -2.640831 | 4.532241  |

### Cartesian Coordinates (in Å) of CCC-2a

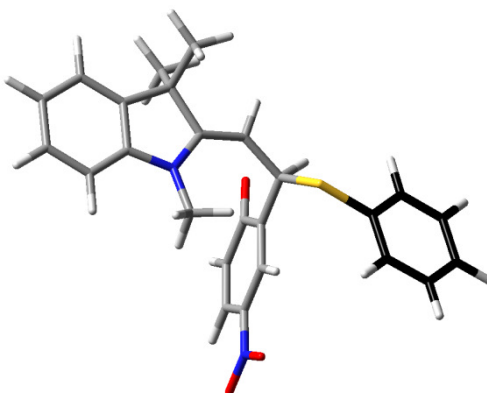

|   |           |          |           |   |           |           |           |
|---|-----------|----------|-----------|---|-----------|-----------|-----------|
| C | -0.034081 | 0.008793 | -0.004836 | H | -0.962185 | -0.060244 | -0.558107 |
| C | -0.040198 | 0.016156 | 1.367544  | C | -0.85187  | 3.206063  | 5.181598  |
| C | 1.224933  | 0.044762 | 2.114036  | H | -0.972613 | 3.949338  | 5.978131  |
| C | 2.43204   | 0.138642 | 1.312663  | H | -0.896847 | 2.211215  | 5.63698   |

|   |           |           |           |   |           |           |           |
|---|-----------|-----------|-----------|---|-----------|-----------|-----------|
| C | 2.411187  | 0.161593  | -0.057607 | H | 0.142147  | 3.333579  | 4.740777  |
| C | 1.173645  | 0.090108  | -0.738944 | C | -3.347537 | 3.165876  | 4.755626  |
| C | -1.641114 | 1.080227  | 3.107366  | H | -3.427146 | 2.163401  | 5.190394  |
| C | -1.742726 | 2.415967  | 2.915518  | H | -3.516751 | 3.898055  | 5.553793  |
| N | -1.66087  | 3.197799  | 1.756984  | H | -4.142995 | 3.281105  | 4.011829  |
| C | -1.699704 | 4.559838  | 2.069709  | C | -1.788708 | 2.748163  | 0.382353  |
| C | -1.869218 | 4.73936   | 3.449702  | H | -2.211819 | 1.745038  | 0.361851  |
| C | -1.955911 | 3.377745  | 4.117969  | H | -2.470547 | 3.419907  | -0.151863 |
| C | -1.95198  | 6.017223  | 3.981058  | H | -0.827571 | 2.736019  | -0.142646 |
| C | -1.856962 | 7.12649   | 3.123215  | C | -1.280573 | -0.104962 | 2.238601  |
| C | -1.684476 | 6.934884  | 1.751022  | H | -1.058185 | -0.904621 | 2.950503  |
| C | -1.601693 | 5.647987  | 1.200278  | S | -2.843071 | -0.693734 | 1.361675  |
| O | 1.262694  | -0.023134 | 3.370931  | C | -2.450891 | -2.382375 | 0.883421  |
| N | 1.139684  | 0.091264  | -2.147493 | C | -2.540454 | -2.75667  | -0.464586 |
| O | 0.035183  | 0.022679  | -2.740287 | C | -2.114966 | -3.347958 | 1.844284  |
| O | 2.215972  | 0.161961  | -2.789402 | C | -2.300645 | -4.079562 | -0.844871 |
| H | -1.455914 | 5.51294   | 0.133388  | H | -2.79407  | -2.012107 | -1.213486 |
| H | -1.607752 | 7.79576   | 1.091848  | C | -1.853328 | -4.66281  | 1.456827  |
| H | -1.91573  | 8.132151  | 3.529523  | H | -2.064418 | -3.073613 | 2.894236  |
| H | -2.090358 | 6.16477   | 5.049683  | C | -1.949768 | -5.033639 | 0.112374  |
| H | -1.821483 | 0.78582   | 4.137508  | H | -2.376977 | -4.359335 | -1.892171 |
| H | 3.374661  | 0.177662  | 1.853309  | H | -1.587762 | -5.401298 | 2.208547  |
| H | 3.326659  | 0.225402  | -0.635097 | H | -1.754702 | -6.060051 | -0.185537 |

### Cartesian Coordinates (in Å) of CTT-2a

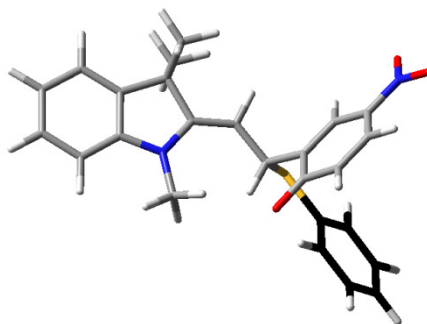

|   |           |           |           |   |           |          |           |
|---|-----------|-----------|-----------|---|-----------|----------|-----------|
| C | -0.005604 | 0.00766   | 0.025853  | H | -0.936903 | 0.006781 | -0.530566 |
| C | -0.014962 | -0.010504 | 1.402345  | C | -4.528521 | 3.170078 | 1.8109    |
| C | 1.238925  | -0.028538 | 2.155981  | H | -5.118756 | 4.066719 | 1.589712  |
| C | 2.452409  | -0.018055 | 1.364577  | H | -4.331506 | 2.653118 | 0.865541  |
| C | 2.44069   | 0.00324   | -0.007124 | H | -5.132345 | 2.510159 | 2.442291  |
| C | 1.20665   | 0.014125  | -0.697348 | C | -2.369603 | 4.474427 | 1.597445  |
| C | -2.017832 | 1.368087  | 2.037039  | H | -2.129909 | 3.967523 | 0.656228  |
| C | -2.403291 | 2.303686  | 2.934604  | H | -2.924856 | 5.389409 | 1.360491  |
| N | -2.192473 | 2.371466  | 4.315278  | H | -1.429886 | 4.760348 | 2.081468  |
| C | -2.856096 | 3.472843  | 4.868139  | C | -1.344185 | 1.491208 | 5.100847  |
| C | -3.475141 | 4.220933  | 3.854961  | H | -1.854276 | 0.555359 | 5.365199  |
| C | -3.210712 | 3.55757   | 2.513786  | H | -0.426394 | 1.251519 | 4.556615  |

|   |           |           |           |   |           |           |          |
|---|-----------|-----------|-----------|---|-----------|-----------|----------|
| C | -4.179712 | 5.373417  | 4.167047  | H | -1.066201 | 2.001431  | 6.025298 |
| C | -4.275753 | 5.780397  | 5.508179  | C | -1.295428 | 0.059282  | 2.209752 |
| C | -3.664594 | 5.023485  | 6.509389  | H | -1.035449 | -0.125325 | 3.246688 |
| C | -2.948244 | 3.856747  | 6.207805  | S | -2.565588 | -1.258628 | 1.751562 |
| O | 1.268339  | -0.06234  | 3.421387  | C | -1.749199 | -2.8337   | 1.997328 |
| N | 1.185619  | 0.030903  | -2.110792 | C | -2.342954 | -3.955328 | 1.393221 |
| O | 0.085062  | 0.037572  | -2.709331 | C | -0.598848 | -3.007446 | 2.782205 |
| O | 2.269175  | 0.040079  | -2.739793 | C | -1.80398  | -5.227665 | 1.581223 |
| H | -2.493952 | 3.275361  | 7.003361  | H | -3.227189 | -3.829871 | 0.773338 |
| H | -3.746194 | 5.335727  | 7.547332  | C | -0.059299 | -4.285954 | 2.951489 |
| H | -4.82838  | 6.679629  | 5.764546  | H | -0.113194 | -2.160686 | 3.25658  |
| H | -4.656075 | 5.95878   | 3.38399   | C | -0.656112 | -5.400547 | 2.359691 |
| H | -2.269318 | 1.59638   | 1.003592  | H | -2.278436 | -6.083722 | 1.108388 |
| H | 3.393116  | -0.032137 | 1.909219  | H | 0.835471  | -4.406005 | 3.557283 |
| H | 3.362548  | 0.007778  | -0.577639 | H | -0.231542 | -6.390673 | 2.499634 |

### Cartesian Coordinates (in Å) of TS4

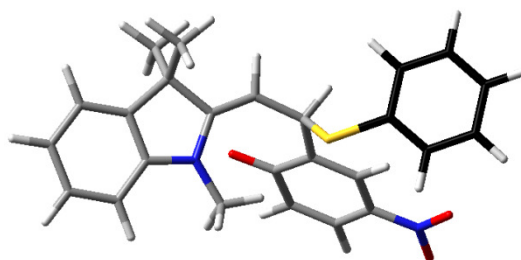

|   |           |           |           |   |           |           |           |
|---|-----------|-----------|-----------|---|-----------|-----------|-----------|
| C | 0.332768  | 0.505442  | -0.004339 | H | 3.483388  | -0.796057 | 1.806135  |
| C | 0.185001  | 0.088784  | 1.305023  | H | 3.674386  | 0.002635  | -0.544313 |
| C | 1.362169  | -0.435385 | 2.021855  | H | -0.52268  | 0.8751    | -0.55589  |
| C | 2.613622  | -0.424046 | 1.270227  | C | -1.404744 | -1.89563  | 5.987791  |
| C | 2.725376  | 0.011335  | -0.019952 | H | -1.767129 | -2.276574 | 6.949806  |
| C | 1.568271  | 0.483806  | -0.683345 | H | -1.857903 | -2.4973   | 5.192521  |
| C | -1.234396 | 0.069626  | 1.88632   | H | -0.32037  | -2.039321 | 5.948952  |
| C | -1.521425 | -0.320989 | 3.30956   | C | -3.308371 | -0.232563 | 5.879808  |
| C | -1.192288 | 0.18768   | 4.516379  | H | -3.792811 | -0.809959 | 5.084668  |
| N | -0.360907 | 1.254684  | 4.868869  | H | -3.700091 | -0.58285  | 6.841997  |
| C | -0.28396  | 1.397366  | 6.254085  | H | -3.590463 | 0.818724  | 5.758988  |
| C | -1.097463 | 0.446557  | 6.887989  | C | 0.423673  | 2.107856  | 3.998774  |
| C | -1.773999 | -0.405699 | 5.827485  | H | 0.231152  | 3.161176  | 4.236585  |
| C | -1.178901 | 0.410512  | 8.271032  | H | 1.495597  | 1.910185  | 4.118541  |
| C | -0.436184 | 1.333245  | 9.028543  | H | 0.162081  | 1.937661  | 2.958497  |
| C | 0.372946  | 2.272474  | 8.386244  | S | -2.196074 | 1.733311  | 1.553347  |
| C | 0.464917  | 2.320478  | 6.987728  | C | -3.038583 | 1.482474  | -0.01053  |
| O | 1.349607  | -0.870905 | 3.198949  | C | -3.921691 | 0.407617  | -0.204129 |
| N | 1.647154  | 0.933765  | -2.016772 | C | -2.872406 | 2.423749  | -1.038676 |
| O | 0.612574  | 1.344611  | -2.596123 | C | -4.604996 | 0.267033  | -1.412645 |
| O | 2.755725  | 0.913884  | -2.605013 | H | -4.081233 | -0.313043 | 0.592922  |
| H | 1.102264  | 3.051939  | 6.501535  | C | -3.578439 | 2.29191   | -2.236748 |



|   |           |           |           |   |           |           |           |
|---|-----------|-----------|-----------|---|-----------|-----------|-----------|
| H | 0.94744   | 2.98202   | 8.97634   | H | -2.186225 | 3.253903  | -0.899403 |
| H | -0.491586 | 1.313022  | 10.113202 | C | -4.440719 | 1.210838  | -2.430779 |
| H | -1.808097 | -0.323177 | 8.769896  | H | -5.279848 | -0.573334 | -1.552023 |
| H | -2.253006 | -1.123037 | 3.369854  | H | -3.442917 | 3.030164  | -3.022621 |
| H | -1.817194 | -0.617611 | 1.267922  | H | -4.982442 | 1.104492  | -3.3664   |

### Cartesian Coordinates (in Å) of TS5

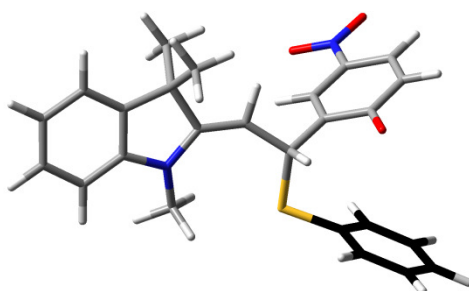

|   |           |           |           |   |           |           |           |
|---|-----------|-----------|-----------|---|-----------|-----------|-----------|
| C | -0.004846 | -0.009116 | 0.037045  | H | -0.942084 | 0.005936  | -0.50945  |
| C | -0.00711  | 0.001484  | 1.412307  | C | -3.08397  | 3.831856  | 0.282209  |
| C | 1.251025  | 0.00311   | 2.163892  | H | -3.280944 | 4.900948  | 0.140075  |
| C | 2.460587  | -0.03961  | 1.35894   | H | -2.016826 | 3.655232  | 0.107395  |
| C | 2.44065   | -0.062995 | -0.011123 | H | -3.650945 | 3.276831  | -0.472629 |
| C | 1.2019    | -0.04514  | -0.696868 | C | -2.674756 | 4.188115  | 2.754718  |
| C | -2.076213 | 1.31882   | 1.871798  | H | -1.59882  | 4.03055   | 2.624661  |
| C | -3.318998 | 1.854713  | 1.889389  | H | -2.870932 | 5.261684  | 2.652647  |
| N | -4.605334 | 1.311384  | 2.045868  | H | -2.943403 | 3.88708   | 3.772689  |
| C | -5.570536 | 2.322985  | 2.112233  | C | -4.98282  | -0.078134 | 1.876355  |
| C | -4.976561 | 3.57857   | 1.925381  | H | -4.368634 | -0.534974 | 1.096315  |
| C | -3.485615 | 3.39552   | 1.709462  | H | -4.873644 | -0.661969 | 2.795549  |
| C | -5.750704 | 4.72905   | 1.940006  | H | -6.024736 | -0.124957 | 1.550921  |
| C | -7.135467 | 4.625462  | 2.152357  | C | -1.300086 | 0.051936  | 2.205242  |
| C | -7.71635  | 3.370785  | 2.345737  | H | -1.001856 | 0.106585  | 3.257799  |
| C | -6.944896 | 2.200473  | 2.332615  | S | -2.218641 | -1.5943   | 2.081206  |
| O | 1.291775  | 0.049158  | 3.422368  | C | -0.981151 | -2.74588  | 2.686444  |
| N | 1.172226  | -0.063135 | -2.106624 | C | -0.263521 | -3.540677 | 1.781944  |
| O | 0.067846  | -0.040552 | -2.701263 | C | -0.779641 | -2.917567 | 4.063932  |
| O | 2.252171  | -0.101845 | -2.744138 | C | 0.644541  | -4.493968 | 2.249901  |
| H | -7.413259 | 1.236737  | 2.504112  | H | -0.418767 | -3.411314 | 0.715438  |
| H | -8.786802 | 3.292395  | 2.517637  | C | 0.135628  | -3.863511 | 4.528056  |
| H | -7.750647 | 5.520479  | 2.170234  | H | -1.342789 | -2.312413 | 4.768439  |
| H | -5.293838 | 5.704342  | 1.788287  | C | 0.847582  | -4.655074 | 3.622162  |
| H | -1.333856 | 2.087939  | 1.668994  | H | 1.193824  | -5.107747 | 1.541024  |
| H | 3.405282  | -0.047287 | 1.897253  | H | 0.286444  | -3.987953 | 5.597044  |
| H | 3.35885   | -0.092235 | -0.587124 | H | 1.55425   | -5.396339 | 3.985211  |

### Cartesian Coordinates (in Å) of TS6

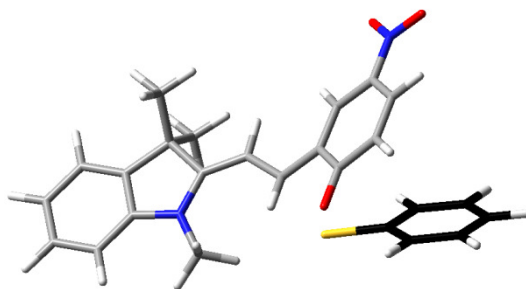

|   |           |           |           |   |           |           |           |
|---|-----------|-----------|-----------|---|-----------|-----------|-----------|
| C | 0.002522  | -0.000888 | 0.002899  | H | -0.926808 | -0.015121 | -0.554657 |
| C | 0.003219  | 0.001385  | 1.392426  | C | -5.448611 | 0.529012  | 0.765607  |
| C | 1.280747  | -0.000809 | 2.129825  | H | -6.350813 | 0.948141  | 0.306523  |
| C | 2.484689  | 0.011602  | 1.315429  | H | -4.77813  | 0.203739  | -0.03687  |
| C | 2.450033  | 0.017688  | -0.051398 | H | -5.737736 | -0.349922 | 1.35064   |
| C | 1.199766  | 0.008425  | -0.724608 | C | -4.355271 | 2.816552  | 0.807402  |
| C | -2.445027 | 0.542446  | 1.70823   | H | -3.673181 | 2.524698  | 0.002359  |
| C | -3.551509 | 0.988038  | 2.392496  | H | -5.242284 | 3.270225  | 0.351925  |
| N | -3.805732 | 1.01262   | 3.744499  | H | -3.858959 | 3.574586  | 1.421621  |
| C | -5.037763 | 1.641628  | 4.016487  | C | -2.948854 | 0.488563  | 4.798818  |
| C | -5.658434 | 1.998542  | 2.81324   | H | -2.533066 | -0.475554 | 4.501779  |
| C | -4.765456 | 1.592679  | 1.656359  | H | -2.133039 | 1.181901  | 5.034862  |
| C | -6.898226 | 2.620628  | 2.825706  | H | -3.546884 | 0.334022  | 5.697366  |
| C | -7.514246 | 2.89062   | 4.057381  | C | -1.205371 | 0.031487  | 2.196764  |
| C | -6.879733 | 2.538333  | 5.250701  | H | -0.975365 | 0.137782  | 3.24711   |
| C | -5.627784 | 1.908979  | 5.251203  | S | -1.710385 | -2.36443  | 2.605344  |
| O | 1.332189  | -0.000209 | 3.385125  | C | -0.426293 | -3.36426  | 1.903367  |
| N | 1.162081  | 0.009413  | -2.14306  | C | -0.68818  | -4.182229 | 0.783611  |
| O | 0.056542  | -0.00155  | -2.727364 | C | 0.877352  | -3.383365 | 2.441975  |
| O | 2.238946  | 0.021715  | -2.778732 | C | 0.30204   | -5.00306  | 0.243821  |
| H | -5.146003 | 1.654325  | 6.188998  | H | -1.682579 | -4.173999 | 0.345463  |
| H | -7.358595 | 2.756793  | 6.201178  | C | 1.868603  | -4.197309 | 1.891777  |
| H | -8.484195 | 3.37848   | 4.081755  | H | 1.108045  | -2.741343 | 3.286043  |
| H | -7.388376 | 2.898995  | 1.896176  | C | 1.587475  | -5.016254 | 0.794362  |
| H | -2.548266 | 0.60752   | 0.629404  | H | 0.070495  | -5.630363 | -0.613878 |
| H | 3.433131  | 0.016105  | 1.846003  | H | 2.866076  | -4.193454 | 2.32536   |
| H | 3.360889  | 0.02701   | -0.638988 | H | 2.359948  | -5.652746 | 0.371093  |
